# Supplementary material
Source: publisher figshare collection journal article supplement (https://gsajournals.figshare.com/ndownloader/files/31976150)
Supplement: Supplementary file 1 [file 31976150]

| Pop | Variance component | ASI [d] | EV [ ] | Final PH [cm] | GDM [%] | GYield  [t /ha] | Pconc  [ppm] |
| --- | --- | --- | --- | --- | --- | --- | --- |
| WA |  | 12.50 | 0.68 | 240 | 37.20 | 0.17 | 34 103 |
|  | 5.51 | 0.33 | 47 | 11.10 | 0.12 | 8 888 |
|  | 0.85 | 0.82 | 0.90 | 0.89 | 0.72 | 0.85 |
| SM |  | 9.65 | 1.85 | 708 | 21.50 | 0.60 | 32 404 |
|  | 4.34 | 0.51 | 142 | 5.29 | 0.57 | 14 168 |
|  | 0.84 | 0.90 | 0.93 | 0.89 | 0.73 | 0.81 |
| SF |  | 3.06 | 0.72 | 196 | 15.90 | 0.19 | 20 704 |
|  | 3.54 | 0.34 | 72 | 8.07 | 0.24 | 4 215 |
|  | 0.67 | 0.82 | 0.85 | 0.82 | 0.63 | 0.82 |
| RT |  | 1.13 | 1.10 | 669 | 15.70 | 0.13 | 64 878 |
|  | 0.52 | 0.46 | 79 | 4.12 | 0.08 | 15 050 |
|  | 0.69 | 0.85 | 0.95 | 0.88 | 0.70 | 0.90 |
| GB |  | 6.02 | 1.13 | 371 | 7.59 | 0.45 | 30 276 |
|  | 3.76 | 0.51 | 79 | 7.65 | 0.40 | 1 264 |
|  | 0.79 | 0.84 | 0.91 | 0.69 | 0.74 | 0.90 |
| CG |  | 1.44 | 0.46 | 423 | 12.60 | 0.20 | 180 186 |
|  | 2.03 | 0.28 | 17 | 37.80 | 0.07 | 12 600 |
|  | 0.59 | 0.77 | 0.97 | 0.48 | 0.79 | 0.96 |
| EF |  | 1.62 | 0.26 | 174 | 17.50 | 2.58 | 34 819 |
|  | 1.00 | 0.42 | 38 | 2.78 | 0.45 | 10 284 |
|  | 0.71 | 0.59 | 0.89 | 0.91 | 0.94 | 0.84 |
| ED |  | 1.60 | 0.32 | 280 | 34.30 | 4.94 | 114 046 |
|  | 1.00 | 0.16 | 55 | 10.80 | 1.66 | 9 192 |
|  | 0.71 | 0.77 | 0.91 | 0.89 | 0.90 | 0.95 |
| overall |  | 2.03 | 0.25 | 58.50 | 4.85 | 0.17 | 18 435 |
|  | **0.78** | **0.80** | **0.91** | **0.86** | **0.85** | **0.85** |
